# Supplementary material for: Dipeptidyl peptidase 4 inhibitor use is associated with a lower risk of incident acute kidney injury in patients with diabetes
Source: PubMed Central journal article supplement (PMC5581090; doi:10.18632/oncotarget.18081), 2017-05-23
Supplement: oncotarget-08-53028-s001.pdf [file oncotarget-08-53028-s001.pdf]

# Dipeptidyl peptidase 4 inhibitor use is associated with a lower risk of incident acute kidney injury in patients with diabetes

## Supplementary Materials

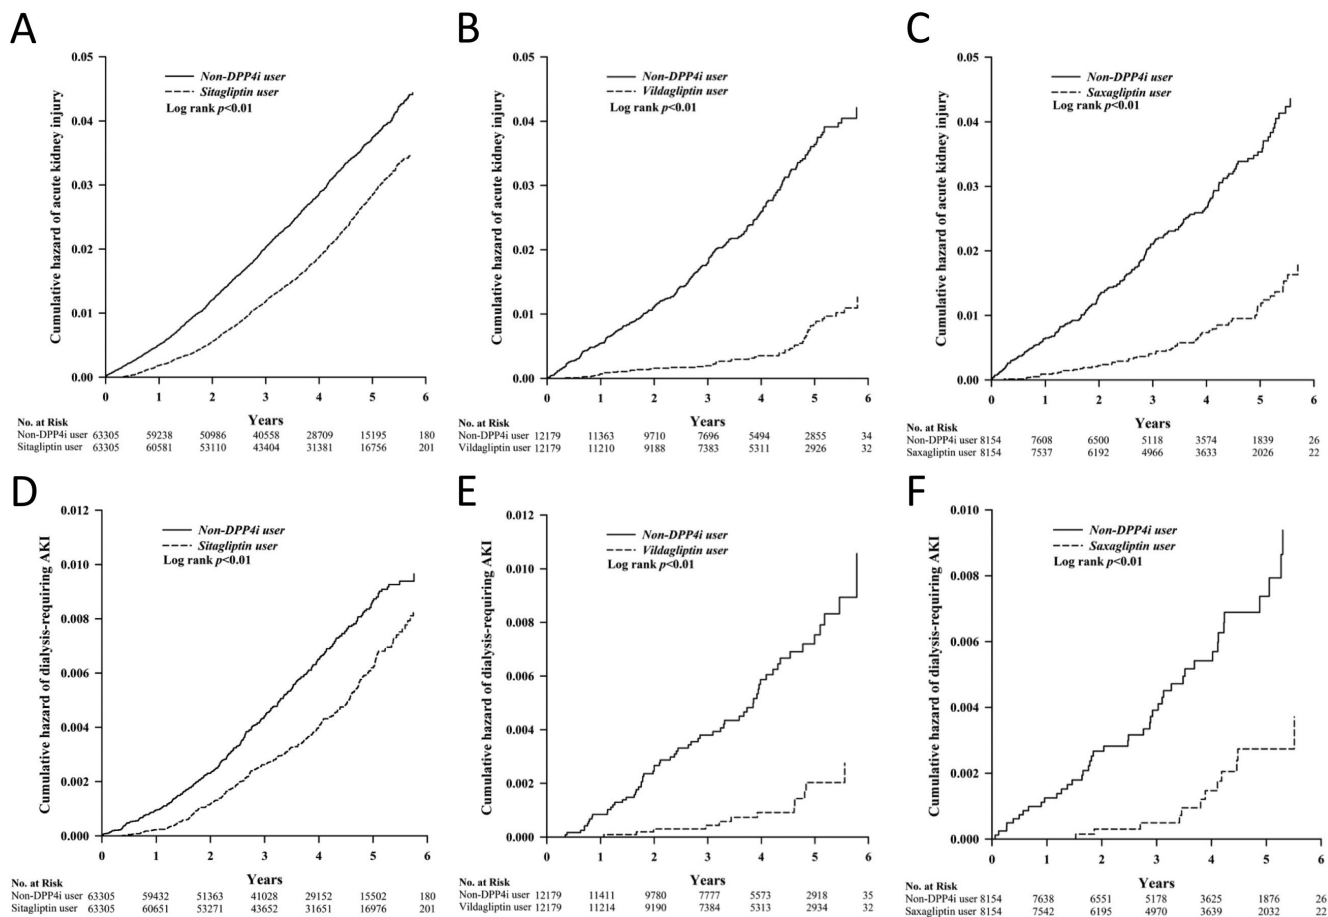

**Supplementary Figure 1:** Kaplan-Meier cumulative hazard curve for incident AKI among non-DPP4i users and sitagliptin (A), vildagliptin (B), and saxagliptin (C) users, and for incident dialysis-requiring AKI among non-DPP4i users and sitagliptin (D), vildagliptin (E), and saxagliptin (F) users. AKI, acute kidney injury; DPP4i, dipeptidyl peptidase 4 inhibitor.

**Supplementary Table 1: Incidence and risk of acute kidney injury among diabetic participants, based on the presence of CKD or not**

| Variables                                       | Without CKD     |                         |                   |                 |                          |                       |                          | With CKD        |                         |                   |                 |                          |                       |                          |
|-------------------------------------------------|-----------------|-------------------------|-------------------|-----------------|--------------------------|-----------------------|--------------------------|-----------------|-------------------------|-------------------|-----------------|--------------------------|-----------------------|--------------------------|
|                                                 | Number of event | Duration (person-years) | Incidence density | Crude analysis† |                          | Fully adjusted Model* |                          | Number of event | Duration (person-years) | Incidence density | Crude analysis† |                          | Fully adjusted Model* |                          |
|                                                 |                 |                         |                   | HR              | 95% CI                   | HR                    | 95% CI                   |                 |                         |                   | HR              | 95% CI                   | HR                    | 95% CI                   |
| Incidence of acute kidney injury                |                 |                         |                   |                 |                          |                       |                          |                 |                         |                   |                 |                          |                       |                          |
| Non-DPP4i users                                 | 439             | 25174.3                 | 17.4              | 1.00            | -                        | 1.00                  | -                        | 1679            | 274625.8                | 6.1               | 1.00            | -                        | 1.00                  | -                        |
| DPP4i users                                     | 286             | 25745.2                 | 11.1              | 0.64            | 0.55 ~ 0.75 <sup>a</sup> | 0.56                  | 0.48 ~ 0.65 <sup>a</sup> | 1018            | 283883.5                | 3.6               | 0.58            | 0.54 ~ 0.63 <sup>a</sup> | 0.57                  | 0.53 ~ 0.62 <sup>a</sup> |
| Non-DPP4i users                                 | 331             | 19280.5                 | 17.2              | 1.00            | -                        | 1.00                  | -                        | 1292            | 208232.7                | 6.2               | 1.00            | -                        | 1.00                  | -                        |
| Sitagliptin users                               | 248             | 19618.7                 | 12.6              | 0.73            | 0.62 ~ 0.87 <sup>a</sup> | 0.64                  | 0.54 ~ 0.75 <sup>b</sup> | 943             | 218759.9                | 4.3               | 0.69            | 0.63 ~ 0.75 <sup>a</sup> | 0.67                  | 0.61 ~ 0.73 <sup>a</sup> |
| Non-DPP4i users                                 | 62              | 3528.7                  | 17.6              | 1.00            | -                        | 1.00                  | -                        | 229             | 39925.6                 | 5.7               | 1.00            | -                        | 1.00                  | -                        |
| Vildagliptin users                              | 16              | 3371.9                  | 4.7               | 0.27            | 0.16 ~ 0.47 <sup>a</sup> | 0.22                  | 0.12 ~ 0.40 <sup>a</sup> | 38              | 38988.4                 | 1.0               | 0.17            | 0.12 ~ 0.24 <sup>a</sup> | 0.17                  | 0.12 ~ 0.25 <sup>a</sup> |
| Non-DPP4i users                                 | 46              | 2365.1                  | 19.4              | 1.00            | -                        | 1.00                  | -                        | 158             | 26467.5                 | 6.0               | 1.00            | -                        | 1.00                  | -                        |
| Saxagliptin users                               | 22              | 2457.8                  | 9.0               | 0.46            | 0.28 ~ 0.76 <sup>b</sup> | 0.39                  | 0.22 ~ 0.67 <sup>b</sup> | 37              | 26135.2                 | 1.4               | 0.24            | 0.16 ~ 0.34 <sup>a</sup> | 0.24                  | 0.17 ~ 0.35 <sup>a</sup> |
| Incident dialysis-requiring acute kidney injury |                 |                         |                   |                 |                          |                       |                          |                 |                         |                   |                 |                          |                       |                          |
| Non-DPP4i users                                 | 111             | 25745.2                 | 4.3               | 1.00            | -                        | 1.00                  | -                        | 358             | 283883.5                | 1.3               | 1.00            | -                        | 1.00                  | -                        |
| DPP4i users                                     | 63              | 25696.5                 | 2.5               | 0.57            | 0.42 ~ 0.77 <sup>a</sup> | 0.50                  | 0.36 ~ 0.69 <sup>a</sup> | 226             | 284661.9                | 0.8               | 0.61            | 0.51 ~ 0.72 <sup>a</sup> | 0.60                  | 0.51 ~ 0.71 <sup>a</sup> |
| Non-DPP4i users                                 | 86              | 19685.8                 | 4.4               | 1.00            | -                        | 1.00                  | -                        | 277             | 209678.0                | 1.3               | 1.00            | -                        | 1.00                  | -                        |
| Sitagliptin users                               | 56              | 19851.1                 | 2.8               | 0.64            | 0.46 ~ 0.90 <sup>b</sup> | 0.55                  | 0.39 ~ 0.78 <sup>b</sup> | 209             | 219511.6                | 1.0               | 0.71            | 0.59 ~ 0.85 <sup>a</sup> | 0.70                  | 0.59 ~ 0.84 <sup>a</sup> |
| Non-DPP4i users                                 | 19              | 3625.4                  | 5.2               | 1.00            | -                        | 1.00                  | -                        | 44              | 40182.1                 | 1.1               | 1.00            | -                        | 1.00                  | -                        |
| Vildagliptin users                              | 5               | 3376.8                  | 1.5               | 0.28            | 0.11 ~ 0.76 <sup>c</sup> | 0.21                  | 0.07 ~ 0.65 <sup>b</sup> | 7               | 39000.1                 | 0.2               | 0.17            | 0.07 ~ 0.37 <sup>a</sup> | 0.17                  | 0.08 ~ 0.39 <sup>a</sup> |
| Non-DPP4i users                                 | 6               | 2434.0                  | 2.5               | 1.00            | -                        | 1.00                  | -                        | 37              | 26629.7                 | 1.4               | 1.00            | -                        | 1.00                  | -                        |
| Saxagliptin users                               | 2               | 2468.6                  | 0.8               | 0.34            | 0.07 ~ 1.67              | 0.01                  | 0.00 ~ 1.61              | 10              | 26150.2                 | 0.4               | 0.27            | 0.14 ~ 0.55 <sup>b</sup> | 0.29                  | 0.14 ~ 0.59 <sup>b</sup> |

<sup>a</sup> $p < 0.0001$ ; <sup>b</sup> $p < 0.01$ ; <sup>c</sup> $p < 0.05$

† Calculated by stratified Cox proportional regression

\* Adjusted for age, gender, all comorbidities, and medications

CI, confidence interval; CKD, chronic kidney disease; DPP4i, dipeptidyl peptidase 4 inhibitor; HR, hazard ratio.

**Supplementary Table 2: Incidence and risk of acute kidney injury among diabetic participants, based on the presence of past AKI or not**

| Variables                                              | Without past history of AKI |                         |                   |                 |                          |                       |                          | With past history of AKI |                         |                   |                 |                          |                       |                          |
|--------------------------------------------------------|-----------------------------|-------------------------|-------------------|-----------------|--------------------------|-----------------------|--------------------------|--------------------------|-------------------------|-------------------|-----------------|--------------------------|-----------------------|--------------------------|
|                                                        | Number of event             | Duration (person-years) | Incidence density | Crude analysis† |                          | Fully adjusted Model* |                          | Number of event          | Duration (person-years) | Incidence density | Crude analysis† |                          | Fully adjusted Model* |                          |
|                                                        |                             |                         |                   | HR              | 95% CI                   | HR                    | 95% CI                   |                          |                         |                   | HR              | 95% CI                   | HR                    | 95% CI                   |
| <b>Incidence of acute kidney injury</b>                |                             |                         |                   |                 |                          |                       |                          |                          |                         |                   |                 |                          |                       |                          |
| Non-DPP4i users                                        | 98                          | 2587.2                  | 37.9              | 1.00            | -                        | 1.00                  | -                        | 2020                     | 297212.9                | 6.8               | 1.00            | -                        | 1.00                  | -                        |
| DPP4i users                                            | 52                          | 2362.6                  | 22.0              | 0.57            | 0.41 ~ 0.80 <sup>b</sup> | 0.50                  | 0.35 ~ 0.72 <sup>b</sup> | 1252                     | 306969.4                | 4.1               | 0.60            | 0.55 ~ 0.64 <sup>a</sup> | 0.57                  | 0.53 ~ 0.62 <sup>a</sup> |
| Non-DPP4i users                                        | 73                          | 1991.2                  | 36.7              | 1.00            | -                        | 1.00                  | -                        | 1550                     | 225522.0                | 6.9               | 1.00            | -                        | 1.00                  | -                        |
| Sitagliptin users                                      | 46                          | 1843.6                  | 25.0              | 0.67            | 0.47 ~ 0.97 <sup>c</sup> | 0.53                  | 0.36 ~ 0.78 <sup>b</sup> | 1145                     | 236535.1                | 4.8               | 0.70            | 0.65 ~ 0.75 <sup>a</sup> | 0.67                  | 0.62 ~ 0.72 <sup>a</sup> |
| Non-DPP4i users                                        | 12                          | 347.6                   | 34.5              | 1.00            | -                        | 1.00                  | -                        | 279                      | 43106.7                 | 6.5               | 1.00            | -                        | 1.00                  | -                        |
| Vildagliptin users                                     | 3                           | 259.2                   | 11.6              | 0.31            | 0.09 ~ 1.11              | -                     | -                        | 51                       | 41101.1                 | 1.2               | 0.19            | 0.14 ~ 0.25 <sup>a</sup> | 0.19                  | 0.14 ~ 0.25 <sup>a</sup> |
| Non-DPP4i users                                        | 13                          | 248.4                   | 52.3              | 1.00            | -                        | 1.00                  | -                        | 191                      | 28584.2                 | 6.7               | 1.00            | -                        | 1.00                  | -                        |
| Saxagliptin users                                      | 3                           | 259.8                   | 11.5              | 0.21            | 0.06 ~ 0.74 <sup>c</sup> | -                     | -                        | 56                       | 28333.2                 | 2.0               | 0.29            | 0.22 ~ 0.40 <sup>a</sup> | 0.28                  | 0.21 ~ 0.38 <sup>a</sup> |
| <b>Incident dialysis-requiring acute kidney injury</b> |                             |                         |                   |                 |                          |                       |                          |                          |                         |                   |                 |                          |                       |                          |
| Non-DPP4i users                                        | 26                          | 2711.8                  | 9.6               | 1.00            | -                        | 1.00                  | -                        | 443                      | 299523.2                | 1.5               | 1.00            | -                        | 1.00                  | -                        |
| DPP4i users                                            | 13                          | 2410.2                  | 5.4               | 0.57            | 0.29 ~ 1.10              | 0.50                  | 0.24 ~ 1.03              | 276                      | 307948.2                | 0.9               | 0.60            | 0.52 ~ 0.70 <sup>a</sup> | 0.57                  | 0.49 ~ 0.67 <sup>a</sup> |
| Non-DPP4i users                                        | 19                          | 2069.3                  | 9.2               | 1.00            | -                        | 1.00                  | -                        | 344                      | 227294.4                | 1.5               | 1.00            | -                        | 1.00                  | -                        |
| Sitagliptin users                                      | 12                          | 1887.2                  | 6.4               | 0.70            | 0.34 ~ 1.45              | 0.53                  | 0.23 ~ 1.23              | 253                      | 237475.5                | 1.1               | 0.70            | 0.59 ~ 0.82 <sup>a</sup> | 0.66                  | 0.56 ~ 0.78 <sup>a</sup> |
| Non-DPP4i users                                        | 6                           | 364.7                   | 16.5              | 1.00            | -                        | 1.00                  | -                        | 57                       | 43442.9                 | 1.3               | 1.00            | -                        | 1.00                  | -                        |
| Vildagliptin users                                     | 1                           | 259.3                   | 3.9               | 0.21            | 0.03 ~ 1.78              | -                     | -                        | 11                       | 42117.5                 | 0.3               | 0.20            | 0.11 ~ 0.38 <sup>a</sup> | 0.20                  | 0.10 ~ 0.38 <sup>a</sup> |
| Non-DPP4i users                                        | 1                           | 277.8                   | 3.6               | 1.00            | -                        | 1.00                  | -                        | 42                       | 28785.9                 | 1.4               | 1.00            | -                        | 1.00                  | -                        |
| Saxagliptin users                                      | 0                           | 263.6                   | 0.0               | -               | -                        | -                     | -                        | 12                       | 28355.2                 | 0.4               | 0.29            | 0.15 ~ 0.55 <sup>b</sup> | 0.31                  | 0.16 ~ 0.59 <sup>b</sup> |

<sup>a</sup>  $p < 0.0001$ ; <sup>b</sup>  $p < 0.01$ ; <sup>c</sup>  $p < 0.05$

† Calculated by stratified Cox proportional regression

\* Adjusted for age, gender, all comorbidities, and medications

AKI, acute kidney injury; CI, confidence interval; DPP4i, dipeptidyl peptidase 4 inhibitor; HR, hazard ratio

**Supplementary Table 3: Incidence and risk of acute kidney injury among diabetic participants, based on their age category**

| Variables                                       | Under 64 years  |                         |                   |                 |                          |                       |                          |                 | ≥ 65 years              |                   |                 |                          |                       |                          |
|-------------------------------------------------|-----------------|-------------------------|-------------------|-----------------|--------------------------|-----------------------|--------------------------|-----------------|-------------------------|-------------------|-----------------|--------------------------|-----------------------|--------------------------|
|                                                 | Number of event | Duration (person-years) | Incidence density | Crude analysis† |                          | Fully adjusted Model* |                          | Number of event | Duration (person-years) | Incidence density | Crude analysis† |                          | Fully adjusted Model* |                          |
|                                                 |                 |                         |                   | HR              | 95% CI                   | HR                    | 95% CI                   |                 |                         |                   | HR              | 95% CI                   | HR                    | 95% CI                   |
| Incidence of acute kidney injury                |                 |                         |                   |                 |                          |                       |                          |                 |                         |                   |                 |                          |                       |                          |
| Non-DPP4i users                                 | 1223            | 231437.5                | 5.3               | 1.00            | -                        | 1.00                  | -                        | 895             | 68362.5                 | 13.1              | 1.00            | -                        | 1.00                  | -                        |
| DPP4i users                                     | 675             | 239117.7                | 2.8               | 0.53            | 0.48 ~ 0.58 <sup>a</sup> | 0.53                  | 0.48 ~ 0.58 <sup>a</sup> | 629             | 70214.2                 | 9.0               | 0.68            | 0.62 ~ 0.75 <sup>a</sup> | 0.63                  | 0.57 ~ 0.70 <sup>a</sup> |
| Non-DPP4i users                                 | 912             | 174825.5                | 5.2               | 1.00            | -                        | 1.00                  | -                        | 711             | 52687.7                 | 13.5              | 1.00            | -                        | 1.00                  | -                        |
| Sitagliptin users                               | 620             | 183517.5                | 3.4               | 0.64            | 0.58 ~ 0.71 <sup>a</sup> | 0.64                  | 0.58 ~ 0.71 <sup>a</sup> | 571             | 54861.1                 | 10.4              | 0.77            | 0.69 ~ 0.86 <sup>a</sup> | 0.71                  | 0.63 ~ 0.79 <sup>a</sup> |
| Non-DPP4i users                                 | 183             | 34396.7                 | 5.3               | 1.00            | -                        | 1.00                  | -                        | 108             | 9057.6                  | 11.9              | 1.00            | -                        | 1.00                  | -                        |
| Vildagliptin users                              | 28              | 33555.5                 | 0.8               | 0.16            | 0.11 ~ 0.23 <sup>a</sup> | 0.15                  | 0.10 ~ 0.23 <sup>a</sup> | 26              | 8804.8                  | 3.0               | 0.25            | 0.16 ~ 0.38 <sup>a</sup> | 0.22                  | 0.14 ~ 0.35 <sup>a</sup> |
| Non-DPP4i users                                 | 128             | 22215.3                 | 5.8               | 1.00            | -                        | 1.00                  | -                        | 76              | 6617.3                  | 11.5              | 1.00            | -                        | 1.00                  | -                        |
| Saxagliptin users                               | 27              | 22044.7                 | 1.2               | 0.21            | 0.14 ~ 0.32 <sup>a</sup> | 0.21                  | 0.14 ~ 0.33 <sup>a</sup> | 32              | 6548.3                  | 4.9               | 0.43            | 0.28 ~ 0.64 <sup>a</sup> | 0.36                  | 0.23 ~ 0.56 <sup>a</sup> |
| Incident dialysis-requiring acute kidney injury |                 |                         |                   |                 |                          |                       |                          |                 |                         |                   |                 |                          |                       |                          |
| Non-DPP4i users                                 | 282             | 232959.3                | 1.2               | 1.00            | -                        | 1.00                  | -                        | 187             | 69275.7                 | 2.7               | 1.00            | -                        | 1.00                  | -                        |
| DPP4i users                                     | 184             | 239682.6                | 0.8               | 0.63            | 0.52 ~ 0.76 <sup>a</sup> | 0.63                  | 0.52 ~ 0.76 <sup>a</sup> | 105             | 70675.8                 | 1.5               | 0.55            | 0.43 ~ 0.70 <sup>a</sup> | 0.49                  | 0.39 ~ 0.63 <sup>a</sup> |
| Non-DPP4i users                                 | 213             | 175951.4                | 1.2               | 1.00            | -                        | 1.00                  | -                        | 150             | 53412.4                 | 2.8               | 1.00            | -                        | 1.00                  | -                        |
| Sitagliptin users                               | 165             | 184065.5                | 0.9               | 0.73            | 0.60 ~ 0.89 <sup>b</sup> | 0.73                  | 0.60 ~ 0.90 <sup>b</sup> | 100             | 55297.2                 | 1.8               | 0.64            | 0.50 ~ 0.83 <sup>b</sup> | 0.57                  | 0.44 ~ 0.74 <sup>a</sup> |
| Non-DPP4i users                                 | 42              | 34634.9                 | 1.2               | 1.00            | -                        | 1.00                  | -                        | 21              | 9172.6                  | 2.3               | 1.00            | -                        | 1.00                  | -                        |
| Vildagliptin users                              | 10              | 33562.5                 | 0.3               | 0.25            | 0.12 ~ 0.49 <sup>a</sup> | 0.27                  | 0.13 ~ 0.64 <sup>b</sup> | 2               | 8814.3                  | 0.2               | 0.10            | 0.02 ~ 0.43 <sup>b</sup> | 0.05                  | 0.01 ~ 0.27 <sup>b</sup> |
| Non-DPP4i users                                 | 27              | 22373.0                 | 1.2               | 1.00            | -                        | 1.00                  | -                        | 16              | 6690.7                  | 2.4               | 1.00            | -                        | 1.00                  | -                        |
| Saxagliptin users                               | 9               | 22054.6                 | 0.4               | 0.34            | 0.16 ~ 0.71 <sup>b</sup> | 0.01                  | 0.17 ~ 0.79 <sup>a</sup> | 3               | 6564.3                  | 0.5               | 0.19            | 0.06 ~ 0.67 <sup>b</sup> | 0.16                  | 0.04 ~ 0.58 <sup>b</sup> |

<sup>a</sup>  $p < 0.0001$ ; <sup>b</sup>  $p < 0.01$ ; <sup>c</sup>  $p < 0.05$

† Calculated by stratified Cox proportional regression

\* Adjusted for age, gender, all comorbidities, and medications

CI, confidence interval; DPP4i, dipeptidyl peptidase 4 inhibitor; HR, hazard ratio

**Supplementary Table 4: ICD-9-CM codes of comorbidities extracted**

| Comorbidities                         | ICD-9-CM codes                                                                                                                                                                         |
|---------------------------------------|----------------------------------------------------------------------------------------------------------------------------------------------------------------------------------------|
| Hypertension                          | 401.x ~ 405.x                                                                                                                                                                          |
| Hyperlipidemia                        | 272.x                                                                                                                                                                                  |
| Chronic liver disease                 | 570.x ~ 573.x                                                                                                                                                                          |
| Atrial fibrillation                   | 427.x                                                                                                                                                                                  |
| Chronic obstructive pulmonary disease | 491.x                                                                                                                                                                                  |
| Acute coronary syndrome               | 410.x, 411.x, 414.x                                                                                                                                                                    |
| Cerebrovascular disease               | 430.x ~ 438.x                                                                                                                                                                          |
| Malignancy                            | 140.x ~ 208.x                                                                                                                                                                          |
| Parkinsonism                          | 332.x                                                                                                                                                                                  |
| Chronic kidney disease                | 016.0x, 042.x, 095.4, 189.x, 223.x, 236.9x, 250.4x, 271.4, 274.1x, 403.x, 404.x, 440.1, 442.1, 446.21, 447.3x, 572.4, 580.x ~ 589.x, 590.x, 591.x, 593.x, 642.1x, 646.2x, 753.x, 984.x |
| Acute kidney injury                   | 580.x, 581.x, 584.x                                                                                                                                                                    |
| Peripheral vascular disease           | 441.x, 443.9x, 785.x, V434, ICD-9-CM Procedure Code 38.49                                                                                                                              |
| Benign prostatic hyperplasia          | 600.0x                                                                                                                                                                                 |
